# Supplementary material for: A mitochondrial-targetable dual functional near-infrared fluorescent probe to monitor pH and H2O2 in living cells and mice
Source: Royal Society of Chemistry journal article supplement (doi:10.1039/d0ra03905e), 2020-01-01
Supplement: d0ra03905e1.pdf [file d0ra03905e1.pdf]

## Supplementary Material

# **A Mitochondrial-Targetable Dual-Functional Near-Infrared Fluorescent Probe to Monitor pH and H<sub>2</sub>O<sub>2</sub> in Living Cells and Mice**

Xueyuan Bi<sup>a</sup>, Yingying Wang<sup>a</sup>, Dandan Wang<sup>a</sup>, Liming Liu<sup>a</sup>, Wen Zhu<sup>a</sup>, Junjie Zhang<sup>b</sup>, Xiaoming Zha<sup>a,\*</sup>

<sup>a</sup> School of Engineering, <sup>b</sup> School of Pharmacy, China Pharmaceutical University, 639  
Longmian Avenue, Nanjing 211198, China

\*Author for correspondence.

Email address: [xmzha@cpu.edu.cn](mailto:xmzha@cpu.edu.cn) (X. Z.)

## Table of contents

|                                                                                                                                        | Page |
|----------------------------------------------------------------------------------------------------------------------------------------|------|
| 1. The limit of detection measurement .....                                                                                            | S3   |
| 2. Comparison of fluorescent probes for H <sub>2</sub> O <sub>2</sub> with the similar active group .....                              | S3   |
| 3. Time-dependent fluorescence changes of target probe <b>NIR-pH-H<sub>2</sub>O<sub>2</sub></b> for H <sub>2</sub> O <sub>2</sub> ...  | S4   |
| 4. The response between <b>NIR-pH-H<sub>2</sub>O<sub>2</sub></b> and H <sub>2</sub> O <sub>2</sub> at different pH .....               | S5   |
| 5. Fluorescent imaging in living cells .....                                                                                           | S5   |
| 6. <sup>1</sup> H NMR, <sup>13</sup> C NMR and HRMS spectrum of the probe <b>NIR-pH-H<sub>2</sub>O<sub>2</sub></b> .....               | S7   |
| 7. The HPLC purity of the probe <b>NIR-pH-H<sub>2</sub>O<sub>2</sub></b> .....                                                         | S9   |
| 8. HRMS spectrum of the reaction product of the probe <b>NIR-pH-H<sub>2</sub>O<sub>2</sub></b> with H <sub>2</sub> O <sub>2</sub> ...  | S11  |
| 9. HPLC analysis of the reaction product of the probe <b>NIR-pH-H<sub>2</sub>O<sub>2</sub></b> with H <sub>2</sub> O <sub>2</sub> .... | S11  |
| 10. References .....                                                                                                                   | S12  |

## 1. The limit of detection measurement

The detection limit of **NIR-pH-H<sub>2</sub>O<sub>2</sub>** towards H<sub>2</sub>O<sub>2</sub> was determined through fluorescence titration. The standard deviation of the blank solution was also measured for 10 times. After the linear slope of fluorescence intensity vs. concentrations of H<sub>2</sub>O<sub>2</sub> was obtained, the detection of limit (LOD) was calculated by following equation:

$$LOD = 3\sigma/\kappa$$

Where  $\sigma$  denotes the standard deviation of blank measurement,  $\kappa$  denotes the slope of the fluorescence intensity vs. H<sub>2</sub>O<sub>2</sub> concentrations.

## 2. Comparison of fluorescent probes for H<sub>2</sub>O<sub>2</sub> with the similar active group

**Table S1.** Comparison of **NIR-pH-H<sub>2</sub>O<sub>2</sub>** with fluorescent H<sub>2</sub>O<sub>2</sub> probes in literature.

| Probes                                                                              | H <sub>2</sub> O <sub>2</sub> response |                |                     |                      | pH Response | Imaging application      | Reference    |
|-------------------------------------------------------------------------------------|----------------------------------------|----------------|---------------------|----------------------|-------------|--------------------------|--------------|
|                                                                                     | Stokes Shift (nm)                      | LOD ( $\mu$ M) | Response time (min) | Detection medium     |             |                          |              |
| 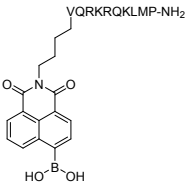 | 148                                    | *              | 120                 | *                    | NO          | HeLa cells               | <sup>1</sup> |
|  | 50                                     | 0.037          | 60                  | Tris buffer          | NO          | LNCaP-luc cells, mice    | <sup>2</sup> |
|  | 50                                     | 0.5            | 60                  | Tris buffer          | NO          | PC3M-luc cells, mice     | <sup>3</sup> |
|  | 105                                    | 1.67           | *                   | PBS buffer (1% EtOH) | NO          | HeLa cells, liver tissue | <sup>4</sup> |
|  | 120                                    | 0.0056         | 35                  | DMSO:PBS (1:1, v/v)  | NO          | HeLa cells               | <sup>5</sup> |

|                                                                                   |     |                                  |                                |                                       |                            |                                                                                                         |           |
|-----------------------------------------------------------------------------------|-----|----------------------------------|--------------------------------|---------------------------------------|----------------------------|---------------------------------------------------------------------------------------------------------|-----------|
| 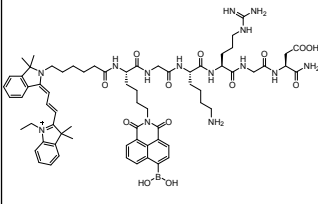 | 192 | 0.26                             | 120                            | PBS buffer                            | NO                         | SKOV-3 cells                                                                                            | 6         |
|  | 50  | 1.4<br>(pH 8)<br>0.99<br>(pH 10) | 80<br>(pH 8),<br>60<br>(pH 10) | alkaline<br>environment<br>(pH > 8)   | NO                         | Endogenous<br>H <sub>2</sub> O <sub>2</sub> in RAW<br>264.7 and A431<br>cells, mice                     | 7         |
|  | 120 | 2.097                            | 30<br>(pH 7.4)                 | PBS buffer<br>(6% CH <sub>3</sub> CN) | pKa = 6.17<br>(pH = 4 ~ 8) | Exogenous and<br>endogenous<br>H <sub>2</sub> O <sub>2</sub> and pH in<br>MCF-7 and Hela<br>cells, mice | This work |

\* The data was not mentioned.

### 3. Time-dependent fluorescence changes of target probe NIR-pH-H<sub>2</sub>O<sub>2</sub> for H<sub>2</sub>O<sub>2</sub>

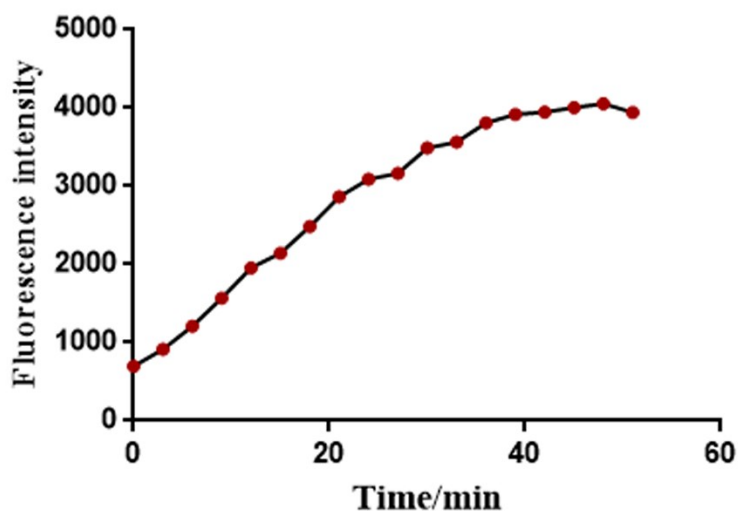

**Fig. S1** Time-dependent fluorescent emission changes of NIR-pH-H<sub>2</sub>O<sub>2</sub> (10 μM) with time after addition 200 μM H<sub>2</sub>O<sub>2</sub> in PBS buffer (6% CH<sub>3</sub>CN). ( $\lambda_{\text{ex}} = 560 \text{ nm}$ ,  $\lambda_{\text{em}} = 680 \text{ nm}$ )

#### 4. The response between NIR-pH-H<sub>2</sub>O<sub>2</sub> and H<sub>2</sub>O<sub>2</sub> at different pH

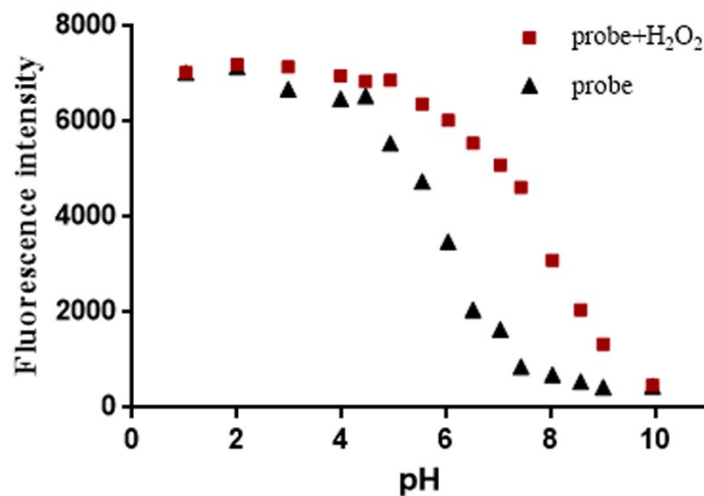

**Fig. S2** Fluorescence intensity (at 680 nm) of NIR-pH-H<sub>2</sub>O<sub>2</sub> (10  $\mu$ M) and NIR-pH- H<sub>2</sub>O<sub>2</sub> + H<sub>2</sub>O<sub>2</sub> (200  $\mu$ M) in 50 mM PBS buffer at pH 1 to 10. ( $\lambda_{\text{ex}}$  = 560 nm,  $\lambda_{\text{em}}$  = 680 nm).

#### 5. Fluorescent imaging in living cells

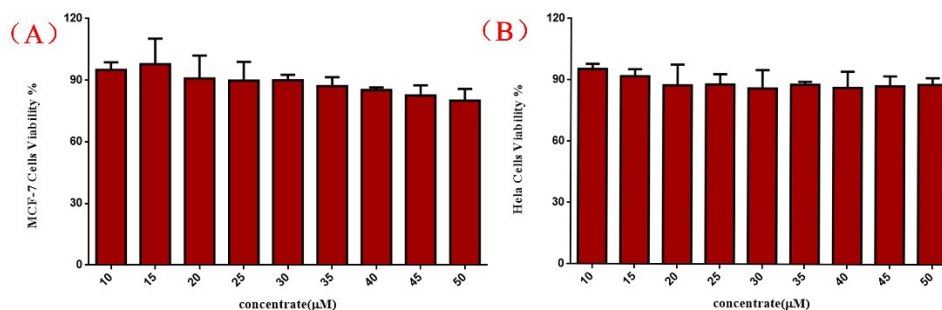

**Fig. S3** MTT toxicity test for determination of cellular activity in MCF-7 cells (A) and HeLa cells (B) treated with different concentrations (10, 15, 20, 25, 30, 35, 40, 45 and 50  $\mu$ M) of NIR-pH-H<sub>2</sub>O<sub>2</sub> for 24 hours.

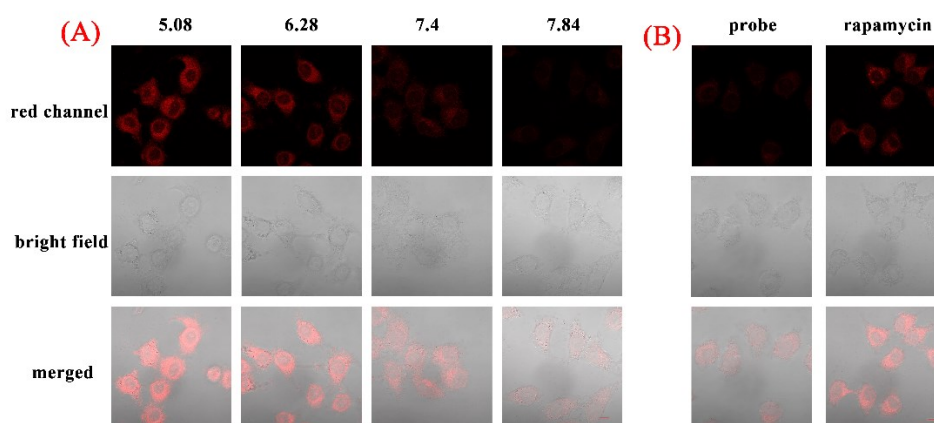

**Fig. S4** Fluorescent microscopic images of HeLa cells with **NIR-pH-H<sub>2</sub>O<sub>2</sub>** with different pH (A)

and rapamycin (B). Scale bar: 10 μm.

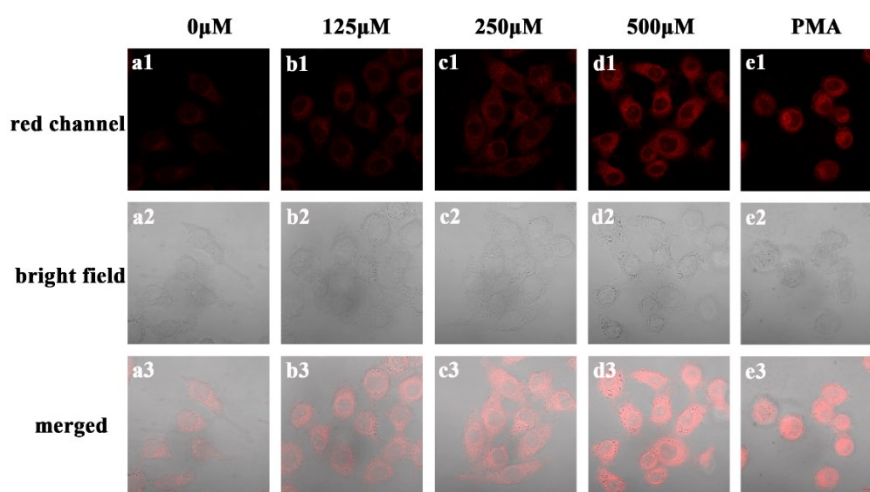

**Fig. S5** Fluorescence images of **NIR-pH-H<sub>2</sub>O<sub>2</sub>** (10 μM) with various concentrations of H<sub>2</sub>O<sub>2</sub>

solution in HeLa cells. Scale bar: 10 μm.

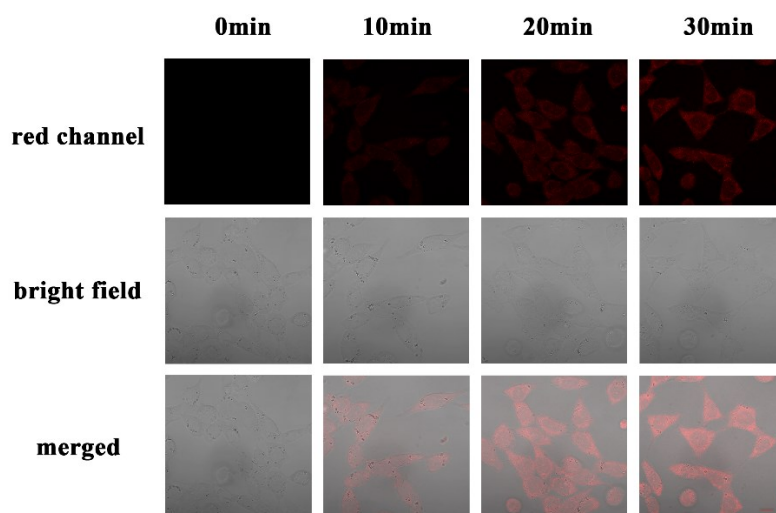

**Fig. S6** Confocal fluorescence images of H<sub>2</sub>O<sub>2</sub> in MCF-7 cells. Cells were pretreated with **NIR-pH-H<sub>2</sub>O<sub>2</sub>** (10 μM) and H<sub>2</sub>O<sub>2</sub> (500 μM) for 0, 10, 20, 30 min respectively, then imaged. Scale bar: 10 μm. ( $\lambda_{\text{ex}} = 555 \text{ nm}$ ,  $\lambda_{\text{em}} = 680 \text{ nm}$  for the red channel).

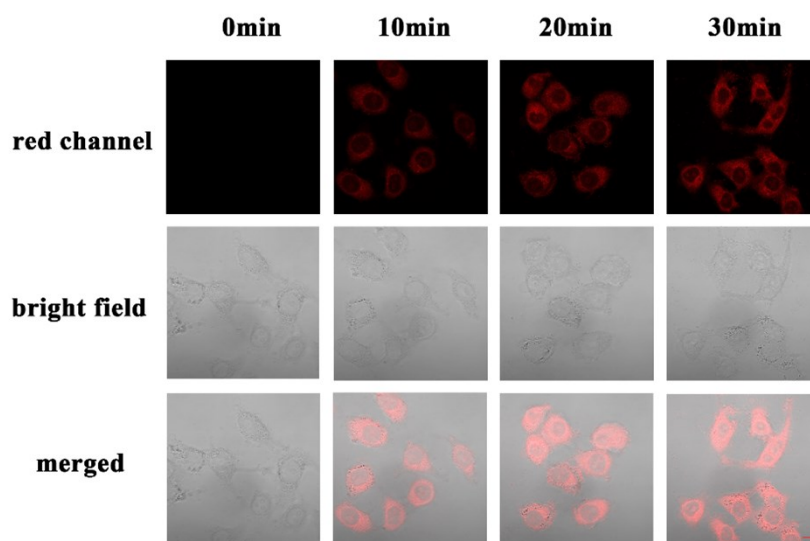

**Fig. S7** Confocal fluorescence images of H<sub>2</sub>O<sub>2</sub> in HeLa cells. Cells were pretreated with **NIR-pH-H<sub>2</sub>O<sub>2</sub>** (10 μM) and H<sub>2</sub>O<sub>2</sub> (500 μM) for 0, 10, 20, 30 min respectively, then imaged. Scale bar: 10 μm. ( $\lambda_{\text{ex}} = 555 \text{ nm}$ ,  $\lambda_{\text{em}} = 680 \text{ nm}$  for the red channel).

## 6. <sup>1</sup>H NMR, <sup>13</sup>C NMR and MS spectrum of the probe NIR-pH-H<sub>2</sub>O<sub>2</sub>

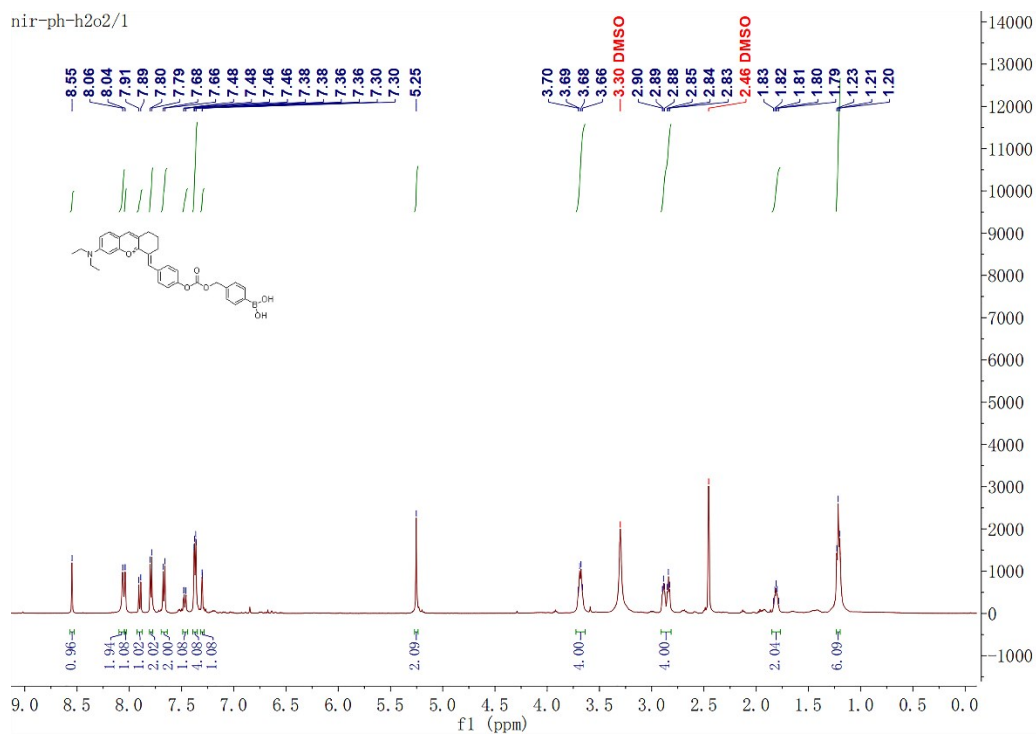

Fig. S8 <sup>1</sup>H NMR spectrum of the probe NIR-pH-H<sub>2</sub>O<sub>2</sub>.

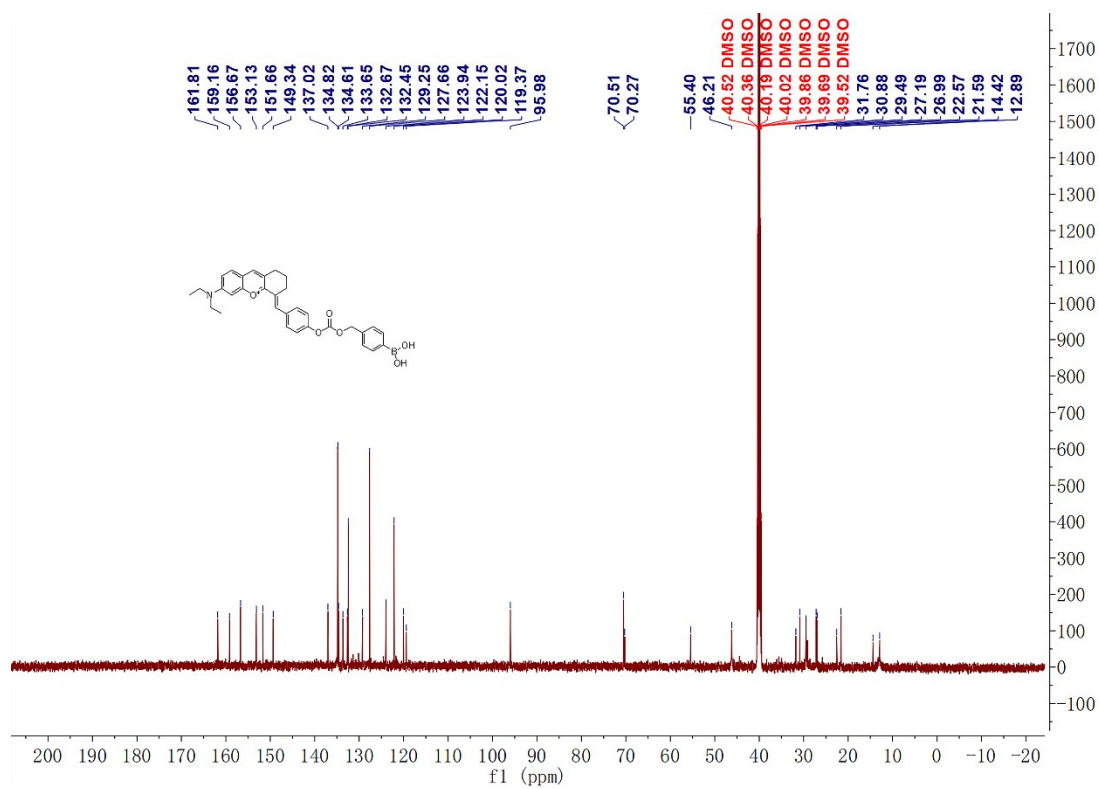

Fig. S9 <sup>13</sup>C NMR spectrum of the probe NIR-pH-H<sub>2</sub>O<sub>2</sub>



|               |        |             |                     |                 |              |                        |                     |
|---------------|--------|-------------|---------------------|-----------------|--------------|------------------------|---------------------|
| Sample Name   | 0.5    | Position    | P1B1                | Instrument Name | Instrument 1 | User Name              | QTOF-PC/QTOF        |
| Inj Vol       | 0.5    | InjPosition |                     | SampleType      | Sample       | IRM Calibration Status | Success             |
| Data Filename | YQ-p.d | ACQ Method  | 20110418-MSonly-p.m | Comment         |              | Acquired Time          | 7/5/2019 5:42:39 PM |

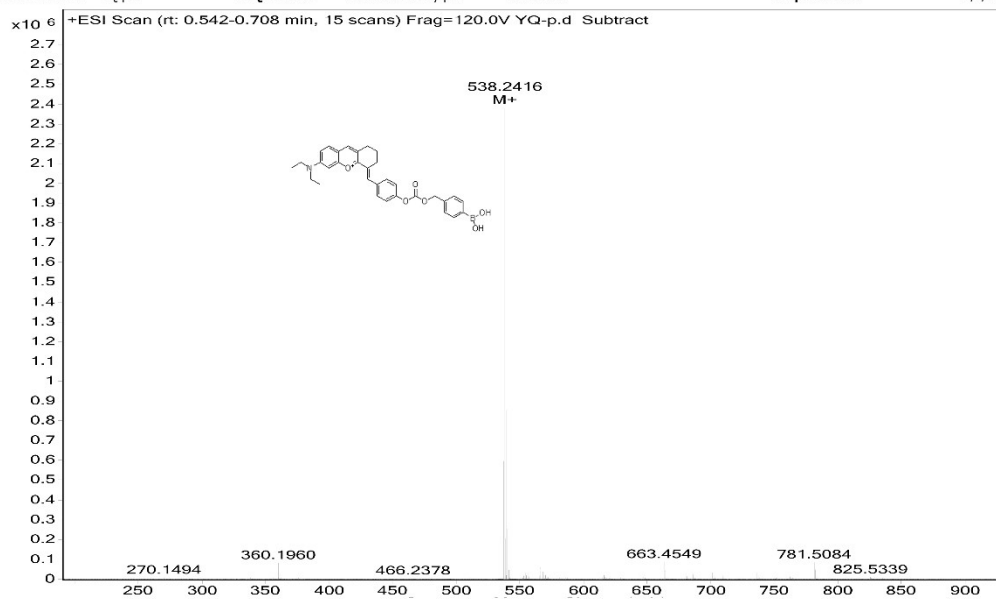

**Fig. S10** HRMS spectrum of the probe NIR-pH-H<sub>2</sub>O<sub>2</sub>

## 7. The HPLC purity of the probe NIR-pH-H<sub>2</sub>O<sub>2</sub>

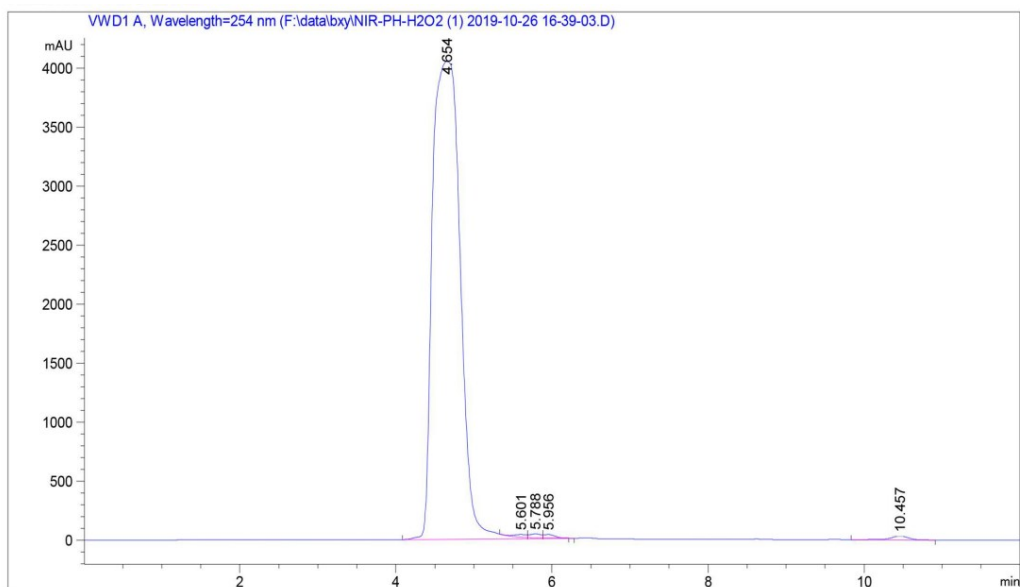

面积百分比报告

排序 : 信号  
 乘积因子 : 1.0000  
 稀释因子 : 1.0000  
 内标使用乘积因子和稀释因子

信号 1: VWD1 A, Wavelength=254 nm

| 峰 # | 保留时间 [min] | 类型   | 峰宽 [min] | 峰面积 [mAU*s] | 峰高 [mAU]   | 峰面积 %   |
|-----|------------|------|----------|-------------|------------|---------|
| 1   | 4.654      | BV R | 0.3992   | 9.97005e4   | 4049.76270 | 98.5473 |
| 2   | 5.601      | VV E | 0.1603   | 249.23721   | 23.02718   | 0.2464  |
| 3   | 5.788      | VV E | 0.1483   | 350.59781   | 33.99863   | 0.3465  |
| 4   | 5.956      | VB E | 0.1455   | 301.52777   | 30.99067   | 0.2980  |

| 峰 # | 保留时间 [min] | 类型   | 峰宽 [min] | 峰面积 [mAU*s] | 峰高 [mAU] | 峰面积 %  |
|-----|------------|------|----------|-------------|----------|--------|
| 5   | 10.457     | VB R | 0.2347   | 568.38464   | 33.71923 | 0.5618 |

总量 : 1.01170e5 4171.49841

Fig. S11 The HPLC purity of NIR-pH-H<sub>2</sub>O<sub>2</sub>.

## 8. HRMS spectrum of the reaction product of the probe NIR-pH-H<sub>2</sub>O<sub>2</sub> with H<sub>2</sub>O<sub>2</sub>

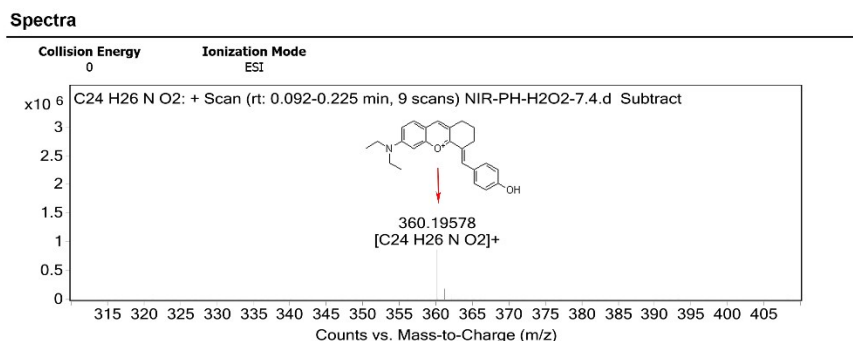

**Fig. S12** HRMS spectrum of the reaction product of the probe NIR-pH-H<sub>2</sub>O<sub>2</sub> with H<sub>2</sub>O<sub>2</sub>.

## 9. HPLC analysis of the reaction product of the probe NIR-pH-H<sub>2</sub>O<sub>2</sub> with H<sub>2</sub>O<sub>2</sub>

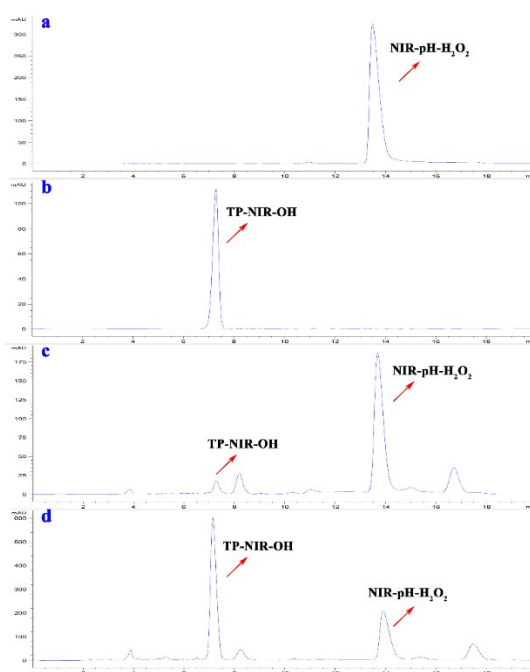

**Fig. S13** HPLC changes of NIR-pH-H<sub>2</sub>O<sub>2</sub> (50 μM), TP-NIR-OH, NIR-pH-H<sub>2</sub>O<sub>2</sub> (50 μM) + H<sub>2</sub>O<sub>2</sub> (25 μM) and NIR-pH-H<sub>2</sub>O<sub>2</sub> (50 μM) + H<sub>2</sub>O<sub>2</sub> (100 μM) in PBS-Buffer (CH<sub>3</sub>CN, V/V, 6%) at pH 7.4. (A) The probe NIR-pH-H<sub>2</sub>O<sub>2</sub> (50 μM) (B) The fluorophore TP-NIR-OH (50 μM) (C) the probe NIR-pH-H<sub>2</sub>O<sub>2</sub> (50 μM) + H<sub>2</sub>O<sub>2</sub> (25 μM). (D) The probe NIR-pH-H<sub>2</sub>O<sub>2</sub> (50 μM) + H<sub>2</sub>O<sub>2</sub>

(100  $\mu$ M).

## References

- 1 Y. Wen, K. Liu, H. Yang, Y. Li, H. Lan, Y. Liu, X. Zhang, T. Yi, *Anal. Chem.*, 2014, **86**, 9970–9976.
- 2 G.C. van de Bittner, E.A. Dubikovskaya, C.R. Bertozzi, C.J. Chang, *Proc. Natl. Acad. Sci. U. S. A.*, 2010, **107**, 21316–21321.
- 3 G.C. van de Bittner, C.R. Bertozzi, C.J. Chang, *J. Am. Chem. Soc.*, 2013, **135**, 1783–1795.
- 4 L. Zhou, H. Ding, W. Zhao, S. Hu, *Spectrochim. Acta A Mol. Biomol. Spectrosc.*, 2019, **206**, 529–534.
- 5 T. Wang, X. Yang, J. Men, J. Zhou, H. Zhang, *Luminescence*, 2020, **35**, 208–214.
- 6 P. Zhao, K. Wang, X. Zhu, Y. Zhou, J. Wu, *Dyes & Pigment.*, 2018, **155**, 143–149.
- 7 K. Liu, H. Shang, X. Kong, M. Ren, J.-Y. Wang, Y. Liu, W. Lin, *Biomaterials*, 2016, **100**, 162–171.
